# Supplementary material for: Characteristics of Urine Organic Acid Metabolites in Nonalcoholic Fatty Liver Disease Assessed Using Magnetic Resonance Imaging with Elastography in Korean Adults
Source: Diagnostics (Basel). 2022 May 11;12(5):1199. doi: 10.3390/diagnostics12051199 (PMC9140840; doi:10.3390/diagnostics12051199)
Supplement: Supplementary file 1 [file diagnostics-12-01199-s001.zip › diagnostics-1717947-supplementary.pdf]

Table S1. The characteristics in urine organic acid metabolites of the study participants

| N = 133, intermediate metabolites in urine (mmol/mol creatinine) |                     |
|------------------------------------------------------------------|---------------------|
| Adipate                                                          | 0.659 (0.483–1.044) |
| Suberate                                                         | 0.565 (0.368–0.821) |
| Ethylmalonate                                                    | 2.191 (1.682–2.747) |
| Pyruvate                                                         | 1.858 (1.020–2.956) |
| L-Lactate                                                        | 16.95 (12.97–21.98) |
| $\beta$ -Hydroxybutyrate                                         | 2.513 (1.207–5.453) |
| Citrate                                                          | 413 (315–538)       |
| cis-Aconitate                                                    | 32.03 (25.64–39.53) |
| Isocitrate                                                       | 45.53 (35.76–57.09) |
| $\alpha$ -Ketoglutarate                                          | 12.15 (6.78–18.58)  |
| Succinate                                                        | 3.421 (2.222–6.125) |
| Fumarate                                                         | 0.288 (0.149–0.496) |
| Malate                                                           | 0.454 (0.296–0.775) |
| Hydroxymethylglutarate                                           | 2.449 (1.933–3.269) |
| $\alpha$ -Ketoisovalerate                                        | 0.197 (0.093–0.295) |
| $\alpha$ -Ketoisocaproate                                        | 0.166 (0.105–0.254) |
| $\alpha$ -Keto- $\beta$ -methylvalerate                          | 0.675 (0.486–1.082) |
| Xanthurenate                                                     | 0.294 (0.205–0.391) |
| $\beta$ -Hydroxyisovalerate                                      | 2.379 (1.689–3.052) |
| Methylmalonate                                                   | 1.423 (1.067–1.754) |
| Formiminoglutamate                                               | 0.425 (0.274–0.621) |
| Vanillylmandelate                                                | 1.922 (1.503–2.479) |
| Homovanillate                                                    | 2.104 (1.542–2.938) |
| 5-Hydroxyindoleacetate                                           | 2.213 (1.746–3.010) |
| Kynurenate                                                       | 0.932 (0.697–1.124) |
| Quinolate                                                        | 2.432 (1.891–2.926) |
| Picolinate                                                       | 0.352 (0.250–0.519) |
| p-Hydroxyphenyllactate                                           | 0.300 (0.219–0.453) |
| 8-Hydroxy-2-deoxyguanosine                                       | 2.165 (1.554–2.842) |
| 2-Methylhippurate                                                | 0.018 (0.012–0.029) |
| Orotate                                                          | 0.635 (0.474–0.839) |
| Glucarate                                                        | 2.886 (2.226–3.587) |
| $\alpha$ -Hydroxybutyrate                                        | 0.384 (0.241–0.631) |
| Pyroglutamate                                                    | 18.74 (16.23–20.65) |
| Sulfate                                                          | 2480 (1953–3165)    |
| Benzoate                                                         | 0.448 (0.346–0.644) |
| Hippurate                                                        | 93.1 (47.3–173.8)   |
| Phenylacetate                                                    | 0.066 (0.033–0.108) |
| Phenylpropionate                                                 | 0.008 (0.008–0.008) |
| p-Hydroxybenzoate                                                | 0.239 (0.149–0.371) |
| p-Hydroxyphenylacetate                                           | 3.615 (2.245–5.224) |
| Indican                                                          | 14.33 (9.39–20.64)  |
| Tricarballic acid                                                | 0.242 (0.141–0.386) |
| D-Lactate                                                        | 2.070 (0.679–4.566) |
| 3,4-Dihydroxyphenylpropionate                                    | 0.019 (0.006–0.094) |
| Arabinitol                                                       | 34.27 (26.35–45.08) |

Data were expressed as median (interquartile range). The values of the metabolite levels were expressed using the unit of mmol/mol creatinine.

Table S2. The odds ratios of high-level metabolites for hepatic steatosis and fibrosis

|                               | Hepatic steatosis   |          | Hepatic fibrosis    |          |
|-------------------------------|---------------------|----------|---------------------|----------|
|                               | OR                  | <i>P</i> | OR                  | <i>P</i> |
| Adipate                       | 0.247 (0.564–1.285) | 0.242    | 0.588 (1.311–2.921) | 0.645    |
| Suberate                      | 0.423 (0.938–2.077) | 1.000    | 0.690 (1.552–3.491) | 0.387    |
| Ethylmalonate                 | 0.469 (1.028–2.254) | 1.000    | 0.206 (0.455–1.006) | 0.077    |
| Pyruvate                      | 0.948 (2.146–4.857) | 0.100    | 0.504 (1.137–2.564) | 0.917    |
| L-Lactate                     | 0.877 (1.961–4.382) | 0.147    | 0.464 (1.033–2.302) | 1.000    |
| β-Hydroxybutyrate             | 0.281 (0.628–1.408) | 0.351    | 0.206 (0.455–1.006) | 0.077    |
| Citrate                       | 0.647 (1.415–3.093) | 0.502    | 0.395 (0.864–1.888) | 0.867    |
| cis-Aconitate                 | 0.356 (0.794–1.771) | 0.718    | 0.364 (0.802–1.765) | 0.728    |
| Isocitrate                    | 0.590 (1.300–2.863) | 0.653    | 0.428 (0.943–2.079) | 1.000    |
| α-Ketoglutarate               | 0.373 (0.818–1.793) | 0.762    | 0.427 (0.928–2.016) | 1.000    |
| Succinate                     | 0.115 (0.292–0.737) | 0.013    | 0.305 (0.683–1.531) | 0.471    |
| Fumarate                      | 0.552 (1.206–2.638) | 0.787    | 0.541 (1.190–2.621) | 0.816    |
| Malate                        | 0.694 (1.529–3.371) | 0.393    | 0.309 (0.682–1.501) | 0.452    |
| Hydroxymethylglutarate        | 0.469 (1.028–2.254) | 1.000    | 0.867 (1.968–4.466) | 0.152    |
| α-Ketoisovalerate             | 0.694 (1.529–3.371) | 0.393    | 0.502 (1.110–2.459) | 0.955    |
| α-Ketoisocaproate             | 0.647 (1.415–3.093) | 0.502    | 0.337 (0.737–1.610) | 0.571    |
| α-Keto-β-methylvalerate       | 0.452 (1.008–2.246) | 1.000    | 0.892 (2.073–4.818) | 0.131    |
| Xanthurenate                  | 0.605 (1.313–2.850) | 0.623    | 0.499 (1.086–2.367) | 0.992    |
| β-Hydroxyisovalerate          | 0.590 (1.300–2.863) | 0.653    | 0.364 (0.802–1.765) | 0.728    |
| Methylmalonate                | 0.469 (1.028–2.254) | 1.000    | 0.287 (0.628–1.375) | 0.333    |
| Formiminoglutamate            | 1.570 (3.689–8.669) | 0.004    | 0.504 (1.137–2.564) | 0.917    |
| Vanillylmandelate             | 0.165 (0.390–0.923) | 0.048    | 0.364 (0.802–1.765) | 0.728    |
| Homovanillate                 | 0.192 (0.443–1.022) | 0.083    | 0.867 (1.968–4.466) | 0.152    |
| 5-Hydroxyindoleacetate        | 0.397 (0.875–1.927) | 0.896    | 0.740 (1.657–3.712) | 0.301    |
| Kynurenate                    | 0.647 (1.415–3.093) | 0.502    | 0.632 (1.402–3.109) | 0.527    |
| Quinolate                     | 0.814 (1.800–3.980) | 0.208    | 0.810 (1.846–4.205) | 0.205    |
| Picolinate                    | 1.042 (2.270–4.948) | 0.059    | 0.623 (1.360–2.966) | 0.564    |
| p-Hydroxyphenyllactate        | 1.316 (2.980–6.747) | 0.013    | 0.588 (1.311–2.921) | 0.645    |
| 8-Hydroxy-2-deoxyguanosine    | 0.440 (0.959–2.091) | 1.000    | 0.227 (0.496–1.084) | 0.115    |
| 2-Methylhippurate             | 0.581 (1.238–2.635) | 0.719    | 0.713 (1.543–3.340) | 0.362    |
| Orotate                       | 0.281 (0.628–1.408) | 0.351    | 0.632 (1.402–3.109) | 0.527    |
| Glucarate                     | 0.605 (1.313–2.850) | 0.623    | 0.499 (1.086–2.367) | 0.992    |
| α-Hydroxybutyrate             | 0.877 (1.961–4.382) | 0.147    | 0.464 (1.033–2.302) | 1.000    |
| Pyroglutamate                 | 0.140 (0.340–0.828) | 0.026    | 0.464 (1.033–2.302) | 1.000    |
| Sulfate                       | 0.552 (1.206–2.638) | 0.787    | 0.120 (0.273–0.625) | 0.003    |
| Benzoate                      | 0.264 (0.590–1.316) | 0.273    | 0.581 (1.274–2.790) | 0.684    |
| Hippurate                     | 0.203 (0.471–1.091) | 0.115    | 0.309 (0.682–1.501) | 0.452    |
| Phenylacetate                 | 0.380 (0.851–1.909) | 0.852    | 0.545 (1.222–2.739) | 0.776    |
| Phenylpropionate              | 0.452 (1.008–2.246) | 1.000    | 0.394 (0.875–1.943) | 0.901    |
| p-Hydroxybenzoate             | 0.423 (0.938–2.077) | 1.000    | 0.810 (1.846–4.205) | 0.205    |
| p-Hydroxyphenylacetate        | 0.590 (1.300–2.863) | 0.653    | 0.221 (0.491–1.091) | 0.119    |
| Indican                       | 0.552 (1.206–2.638) | 0.787    | 0.395 (0.864–1.888) | 0.867    |
| Tricarballoylate              | 0.220 (0.497–1.125) | 0.135    | 0.427 (0.928–2.016) | 1.000    |
| D-Lactate                     | 0.356 (0.794–1.771) | 0.718    | 0.588 (1.311–2.921) | 0.645    |
| 3,4-Dihydroxyphenylpropionate | 0.247 (0.564–1.285) | 0.242    | 0.810 (1.846–4.205) | 0.205    |
| Arabinitol                    | 0.647 (1.415–3.093) | 0.502    | 0.867 (1.968–4.466) | 0.152    |

High level is defined as the fourth quartile in each metabolite. *P* values were calculated using chi-square tests.
